# Supplementary material for: Systematic Review on In Situ Laser Fenestrated Repair for the Endovascular Management of Aortic Arch Pathologies
Source: MDPI journal article supplement (doi:10.3390/jcm12072496), 2023-03-25
Supplement: s1 [file s1]

## Supplementary Tables

**Table S1.** P.I.C.O. (patient; intervention; comparison; outcome) model was used to define the clinical questions and clinically relevant evidence in the literature.

|          |                                              |                                                                                                                              |
|----------|----------------------------------------------|------------------------------------------------------------------------------------------------------------------------------|
| <b>P</b> | Patient, population or problem               | Patients with aortic arch pathologies                                                                                        |
| <b>I</b> | Intervention, prognostic factor or exposure  | In situ laser fenestrated thoracic endovascular repair (in situ laser FTEVAR) for aortic arch disease                        |
| <b>C</b> | Comparison of intervention                   | No comparison performed                                                                                                      |
| <b>O</b> | Outcome you would like to measure or achieve | Technical success, stroke and mortality at 30-days and mortality and need for re-intervention during the available follow-up |
|          | What type of question are you asking?        | Is in situ laser FTEVAR feasible in patients with aortic arch pathologies?                                                   |
|          |                                              | Is in situ laser FTEVAR safe in patients with aortic arch pathologies?                                                       |
|          |                                              | Is in situ laser FTEVAR effective in patients with aortic arch pathologies?                                                  |
|          | Type of study you want to find               | Observational studies and case series on patients managed in situ laser FTEVAR for aortic arch pathologies                   |

**Table S2.** Strategy of literature research according to PRISMA statement. *Footnotes:* FTEVAR: fenestrated thoracic endovascular aortic repair.

| Frame                                  | Mesh Terms                                                                          | Search                                                       | Inclusion criteria                                                                                                                                                               | Exclusion criteria                                                                                                                                                                                                                                                 | Sources                                          |
|----------------------------------------|-------------------------------------------------------------------------------------|--------------------------------------------------------------|----------------------------------------------------------------------------------------------------------------------------------------------------------------------------------|--------------------------------------------------------------------------------------------------------------------------------------------------------------------------------------------------------------------------------------------------------------------|--------------------------------------------------|
| P (patients, participants, population) | # 1. “Aortic arch”                                                                  | #1 AND<br>#2<br>AND #3<br>AND #4<br>AND #5<br>OR #6<br>OR #7 | Observational studies and case series, reporting on technical success, stroke, mortality and re-intervention of in situ laser FTEVAR<br>Peer-review journals<br>English language | Irrelevant title<br>Irrelevant full text<br>Non-English<br>Editorial, reviews, meta-analyses, technical notes<br>Studies reporting on patients treated with other endovascular techniques, open or hybrid repair<br>Studies reporting on in situ mechanical FTEVAR | Databases (Medline, EMBASE and Cochrane library) |
| I (intervention)                       | #2. #3. #4. “in situ” AND<br>“laser” AND<br>“fenestrated”                           |                                                              |                                                                                                                                                                                  |                                                                                                                                                                                                                                                                    |                                                  |
| C (reference test)                     | NA                                                                                  |                                                              |                                                                                                                                                                                  |                                                                                                                                                                                                                                                                    |                                                  |
| O (outcome)                            | #5. #6. #7. “technical success” OR “mortality”<br>OR “ stroke” OR “re-intervention” |                                                              |                                                                                                                                                                                  |                                                                                                                                                                                                                                                                    |                                                  |
| Time                                   | Search period: 2000- 2022<br>Last search: 15 October 2022                           |                                                              |                                                                                                                                                                                  |                                                                                                                                                                                                                                                                    |                                                  |
